# Supplementary material for: Metal oxide/CeO2 nanocomposites derived from Ce-benzene tricarboxylate (Ce-BTC) adsorbing with metal acetylacetonate complexes for catalytic oxidation of carbon monoxide
Source: Royal Society of Chemistry journal article supplement (doi:10.1039/d1ra03319k), 2021-01-01
Supplement: d1ra03319k1.pdf [file d1ra03319k1.pdf]

## ***Supporting Information***

**Metal oxide/CeO<sub>2</sub> nanocomposites derived from Ce-BTC adsorbing with metal acetylacetonate complexes for preferential oxidation of carbon monoxide**

Dongren Cai\*, Bin Chen, Zhongliang Huang, Xiaoli Zeng, Jingran Xiao, Shufeng Zhou, Guowu Zhan\*

College of Chemical Engineering, Integrated Nanocatalysts Institute (INCI), Huaqiao University,

668 Jimei Avenue, Xiamen, Fujian, 361021, P. R. China

\*Corresponding Authors E-mail: [15506@hqu.edu.cn](mailto:15506@hqu.edu.cn) (D. Cai) and [gwzhan@hqu.edu.cn](mailto:gwzhan@hqu.edu.cn) (G. Zhan)

## Table of contents

### Supporting Figures

|                                                                                                                       |   |
|-----------------------------------------------------------------------------------------------------------------------|---|
| Fig. S1. The reactor of CO oxidation .....                                                                            | 3 |
| Fig. S2. The catalytic activity comparison of Cu/CeO <sub>2</sub> and Cu/CeO <sub>2</sub> (cp) in dry condition ..... | 3 |
| Fig. S3. The pore size distribution of prepared samples.....                                                          | 4 |
| Fig. S4. The FT-IR of Ce-BTC.....                                                                                     | 4 |
| Fig. S5. SEM and TEM images of the prepared samples.....                                                              | 5 |
| Fig. S6. The Raman spectrum of prepared samples .....                                                                 | 5 |

### Supporting Tables

|                                                                                                |   |
|------------------------------------------------------------------------------------------------|---|
| Table S1. Catalytic performance comparison of various catalysts for CO oxidation reaction..... | 6 |
|------------------------------------------------------------------------------------------------|---|

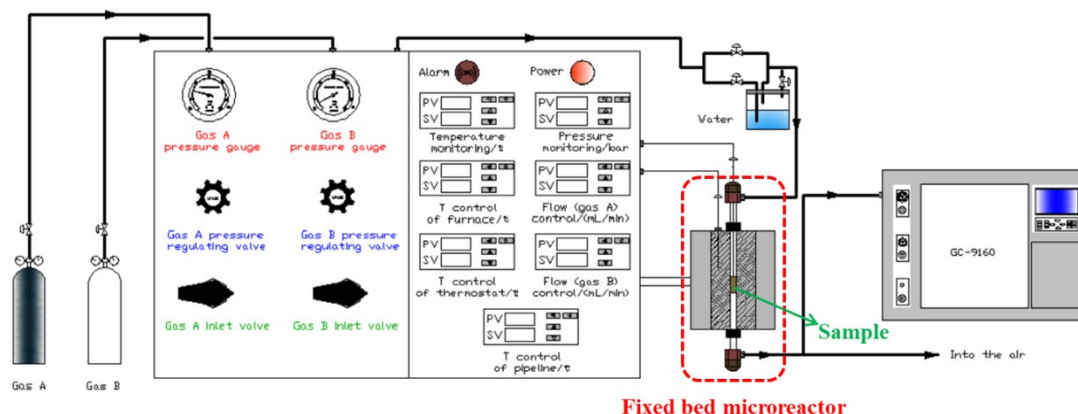

Fig. S1. The reactor of CO oxidation

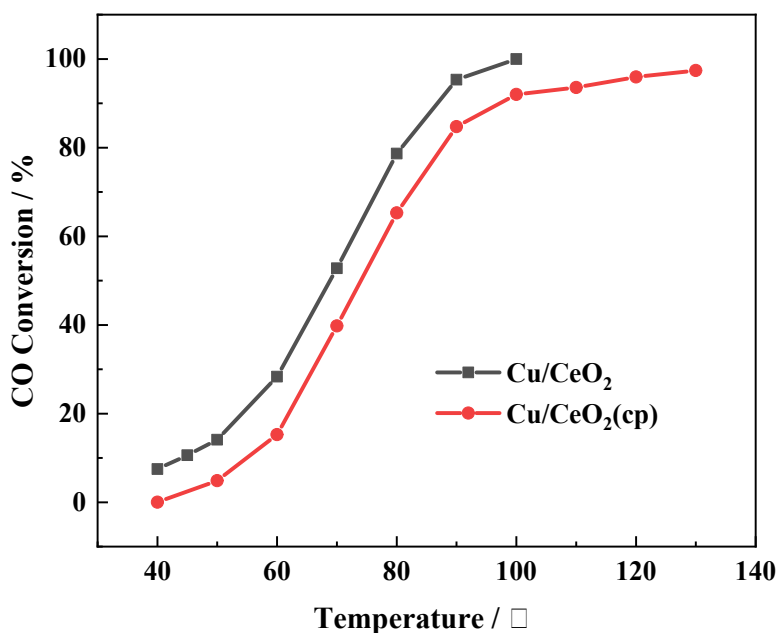

Fig. S2. The catalytic activity comparison of Cu/CeO<sub>2</sub> and Cu/CeO<sub>2</sub>(cp) in dry condition. (The preparation method of Cu/CeO<sub>2</sub>(cp): The Cu/CeO<sub>2</sub>(cp) was prepared by the conventional co-precipitation method. The molar ratio of Cu to Ce in the form of Cu(NO<sub>3</sub>)<sub>2</sub> and Ce(NO<sub>3</sub>)<sub>3</sub> was fixed at 1:8.6. In a typical fabrication, 1 mmol of Cu(NO<sub>3</sub>)<sub>2</sub>·3H<sub>2</sub>O and 8.6 mmol of Ce(NO<sub>3</sub>)<sub>3</sub>·6H<sub>2</sub>O were added to 50 mL of water under sonication for 10 min. Then, the above solution was heated to 45 °C under stirring. Subsequently, 10 mL of an aqueous NaOH solution (4 mol/L) was added dropwise and the mixture was further stirred for 8 h. After the reaction, the product was collected by centrifugation, washing twice with water and once with ethanol, and drying at 60 °C for 10 h. Finally, the sample was calcined at 500 °C for 3 h.)

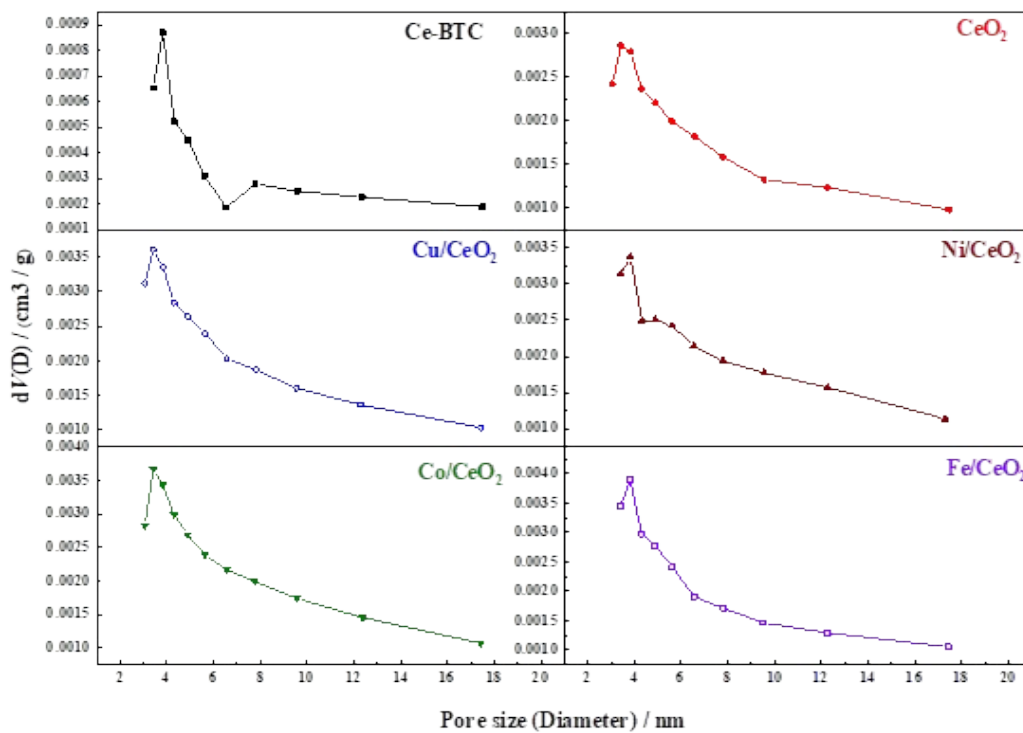

Fig. S3. The pore size distribution of prepared samples

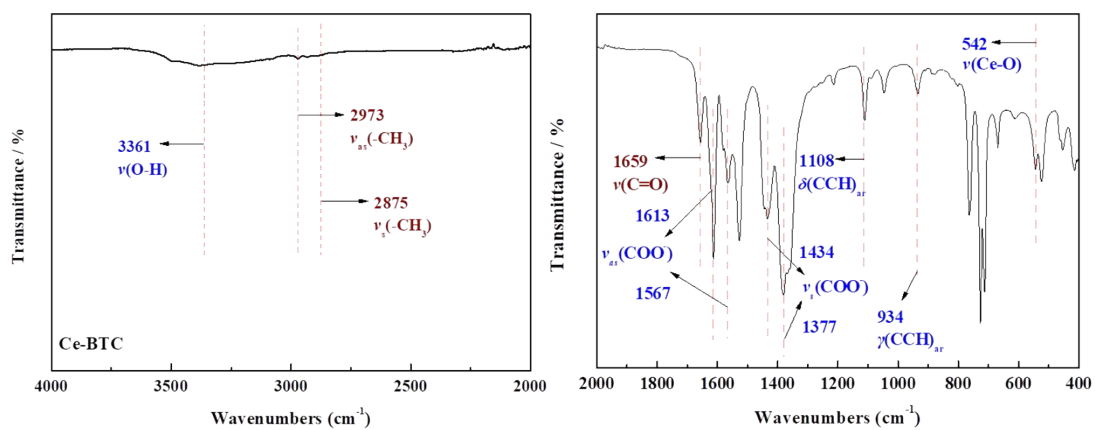

Fig. S4. The FT-IR of Ce-BTC

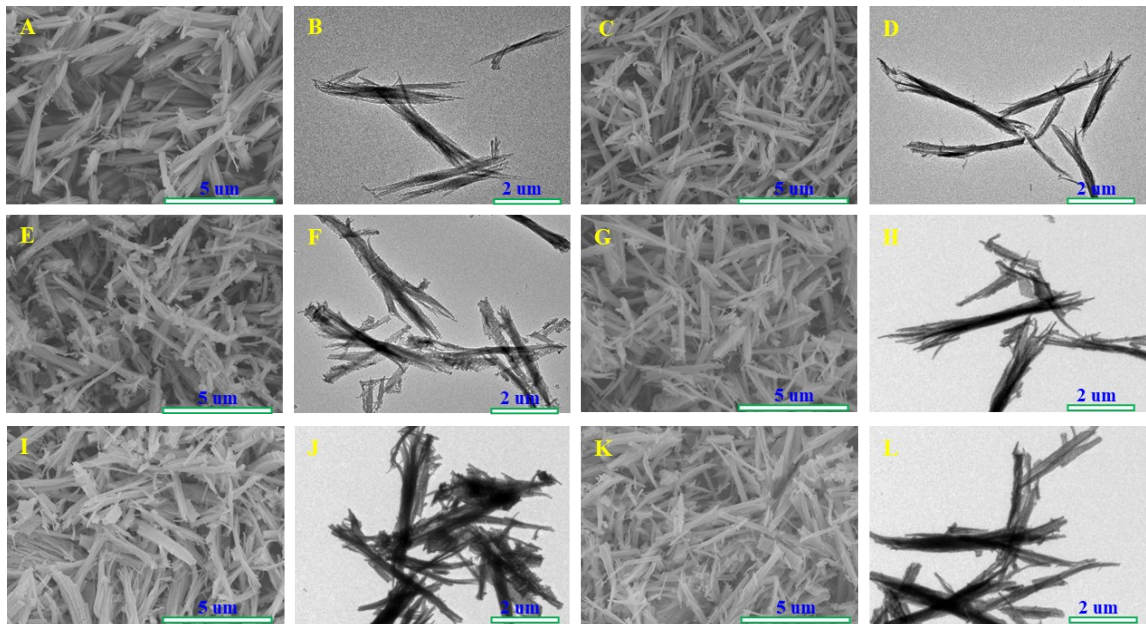

**Fig. S5.** (A,B) SEM and TEM images of Ce-BTC, (C,D) SEM and TEM images of  $\text{CeO}_2$ , (E,F) SEM and TEM images of  $\text{Cu/CeO}_2$ , (G,H) SEM and TEM images of  $\text{Ni/CeO}_2$ , (I,J) SEM and TEM images of  $\text{Co/CeO}_2$ , (K,L) SEM and TEM images of  $\text{Fe/CeO}_2$ .

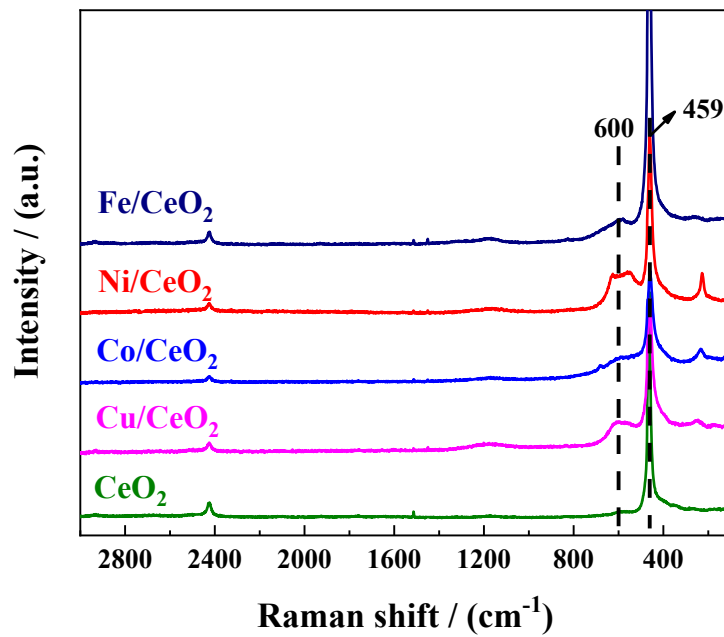

**Fig. S6.** The Raman spectrum of prepared samples

**Table S1.** Catalytic performance comparison of various catalysts for CO oxidation reaction

| Catalyst                                            | Preparation method   | Operating parameters                                                                                                                                                           | $T_{100} / ^\circ\text{C}$ | Ref       |
|-----------------------------------------------------|----------------------|--------------------------------------------------------------------------------------------------------------------------------------------------------------------------------|----------------------------|-----------|
|                                                     |                      | Catalyst: 130 mg, gas: 95.00 vol% N <sub>2</sub> , 4.00 vol% O <sub>2</sub> , and 1.00 vol% CO, flow rate: 20 mL/min                                                           | 100                        |           |
|                                                     |                      | Catalyst: 130 mg, gas: 90.25 vol% N <sub>2</sub> , 5.00 vol% H <sub>2</sub> O, 3.80 vol% O <sub>2</sub> , and 0.95 vol% CO, flow rate: 20 mL/min                               | 140                        |           |
| Cu/CeO <sub>2</sub>                                 | Thermolysis of MOF   | Catalyst: 130 mg, gas: 75.00 vol% H <sub>2</sub> , 23.75 vol% N <sub>2</sub> , 1.00 vol% O <sub>2</sub> , 0.25 vol% CO, flow rate: 40 mL/min                                   | 110                        | This work |
|                                                     |                      | Catalyst: 130 mg, gas: 71.25 vol% H <sub>2</sub> , 22.55 vol% N <sub>2</sub> , 5.00 vol% H <sub>2</sub> O, 0.96 vol% O <sub>2</sub> , and 0.24 vol% CO, flow rate: 40 mL/min   | 140                        |           |
| CuO-CeO <sub>2</sub>                                | Co-precipitation     | Catalyst: 50 mg, gas: 1 vol% CO, 1 vol% O <sub>2</sub> , 20 vol% H <sub>2</sub> O, 13.5 vol% CO <sub>2</sub> , 50 vol% H <sub>2</sub> , and He balanced, flow rate: 100 mL/min | 120                        | 1         |
| CeO <sub>2</sub> /CuO                               | Impregnation         | Catalyst: 100 mg, gas: 1.5 vol% O <sub>2</sub> , 1.5 vol% CO, 55 vol% H <sub>2</sub> , and N <sub>2</sub> balanced, space velocity: 40000 mL/g/h                               | 125                        | 2         |
| CeO <sub>2</sub> /Co <sub>3</sub> O <sub>4</sub>    | Impregnation         | Catalyst: 500 mg, gas: 10% O <sub>2</sub> /He, 4% CO/He, flow rate: 20 mL/min.                                                                                                 | 135                        | 3         |
| CeO <sub>2</sub> -Al <sub>2</sub> O <sub>3</sub>    | Gel combustion       | Catalyst: 200 mg, gas: 570 ppm CO, 20 vol% O <sub>2</sub> , and N <sub>2</sub> balanced, flow rate: 1000 mL/min                                                                | 160                        | 4         |
| Ni-Co bimetal oxides                                | Co-impregnation      | Catalyst: 200 mg, gas: 2 vol% CO, 20 vol% O <sub>2</sub> , and Ar balanced, space velocity: 600 mL/g/h                                                                         | 100                        | 5         |
| ZIF-67@LDO                                          | Thermolysis of MOF   | Catalyst: 50 mg, gas: 1 vol% CO, 10 vol% O <sub>2</sub> , and N <sub>2</sub> balanced, flow rate: 60 mL/min                                                                    | 140                        | 6         |
| Cu/CeO <sub>2</sub> -Nb <sub>2</sub> O <sub>5</sub> | Wetness impregnation | Catalyst: 150 mg, gas: 20 vol% H <sub>2</sub> , 2 vol% CO, 2 vol% O <sub>2</sub> , 5% H <sub>2</sub> O, and balanced He, flow rate: 50 mL/min                                  | 135                        | 7         |
| Mn-Cu bimetal oxides                                | Thermolysis of MOF   | Catalyst: 50 mg, gas: 95.00 vol% N <sub>2</sub> , 4.00 vol% O <sub>2</sub> , and 1.00 vol% CO, flow rate: 20 mL/min                                                            | 170                        | 8         |

|                                                     |                 |                                                                                                                              |     |    |
|-----------------------------------------------------|-----------------|------------------------------------------------------------------------------------------------------------------------------|-----|----|
| CoCe                                                | Impregnation    | Catalyst: 500 mg, gas: 97.00 vol% N <sub>2</sub> , 2.00 vol% O <sub>2</sub> , and 1.00 vol% CO, space velocity: 30000 mL/g/h | 255 | 9  |
| Mn <sub>5</sub> Co <sub>1</sub> O <sub>x</sub> -400 | Co-impregnation | Gas: 1 vol% CO in air                                                                                                        | 275 | 10 |

## References

1. D.H. Kim, J.E. Cha. A CuO-CeO<sub>2</sub> mixed-oxide catalyst for CO clean-up by selective oxidation in hydrogen-rich mixtures. *Catal. Lett.* 2002, 86: 107-112
2. S. Zeng, K. Liu, L. Zhang, B. Qin, T. Chen, Y. Yin, H. Su. Deactivation analyses of CeO<sub>2</sub>/CuO catalysts in the preferential oxidation of carbon monoxide. *J. Power Sources.* 2014, 261: 46-54.
3. C. Tang, L. Hsu, S. Yu, C. Wang, S. Chien. In situ FT-IR and TPD-MS study of carbon monoxide oxidation over a CeO<sub>2</sub>/Co<sub>3</sub>O<sub>4</sub> catalyst. *J. Vibration. Spectrosc.* 2013, 65: 110-115.
4. D.N. Nhiem, L.M. Dai, D.N. Van, D.T. Lim. Catalytic oxidation of carbonmonoxide over nanostructured CeO<sub>2</sub>-Al<sub>2</sub>O<sub>3</sub> prepared by combustion method using polyvinyl chloride. *Ceram. Int.* 2013, 39: 3381-3385.
5. Y. Gou, X. Liang, B. Chen. Porous Ni-Co bimetal oxides nanosheets and catalytic properties for CO oxidation. *J. Alloy Compd.* 2013, 574: 181-187.
6. W. Kong, J. Li, Y. Chen, Y. Ren, Y. Guo, S. Niu, Y. Yang. ZIF-67-derived hollow nanocages with layered double oxides shell as high-Efficiency catalysts for CO oxidation. *Appl. Surf. Sci.* 2018, 437: 161-168.
7. E.O. Jardim, S. Rico-Frances, Z. Abdelouahab-Reddam, F. Coloma, J. SilvestreAlbero, A. Sepulveda-Escribano, E.V. Ramos-Fernandez. High performance of Cu/CeO<sub>2</sub>-Nb<sub>2</sub>O<sub>5</sub> catalyst for preferential CO oxidation and total combustion of toluene. *Appl. Catal. A.* 2015, 502: 129-137.
8. B. Chen, X. Yang, X. Zeng, Z. Huang, J. Xiao, J. Wang, G. Zhan. Multicomponent metal oxides derived from Mn-BTC anchoring with metal acetylacetonate complexes as excellent catalysts for

VOCs and CO oxidation. Chem. Eng. J. 2020, 397: 125424.

9. K. Rida, A.L. Camara, M.A. Pena, C.L. Bolivar-Diaz, A. Martinez-Arias. Bimetallic Co-Fe and Co-Cr oxide systems supported on CeO<sub>2</sub>: Characterization and CO oxidation catalytic behavior. Int. J. Hydrogen Energy. 2015, 40: 11267-11278.

10. F. Bin, X. Wei, B. Li, K.S. Hui. Self-sustained combustion of carbon monoxide promoted by the Cu-Ce/ZSM-5 catalyst in CO/O<sub>2</sub>/N<sub>2</sub> in atmosphere. Appl. Catal. B. 2015, 162: 282-288.
